# Supplementary material
Source: Springer Nature journal article supplement (https://www.springermedizin.de/resource/supplementary/13058_2012_3224_MOESM10_ESM.pdf/9703556)

**A**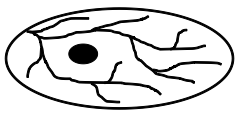

- Dissociation  
- Removal of adipocytes, RBCs, fibroblasts, WBCs

FACS

Myoepithelial cells  
Basal CD49f<sup>High</sup> stem/progenitor cells  
Luminal Sca1- cells  
Luminal Sca1+ cells

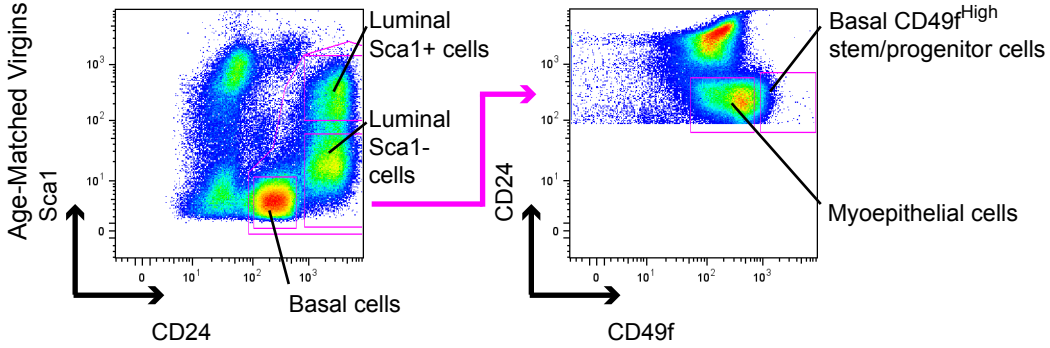**B**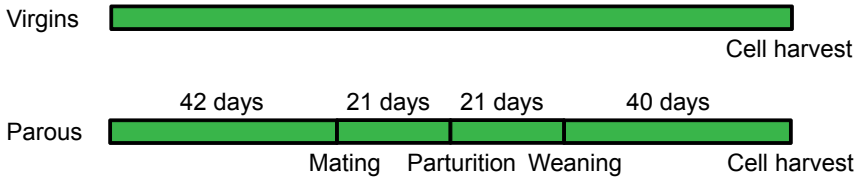**C**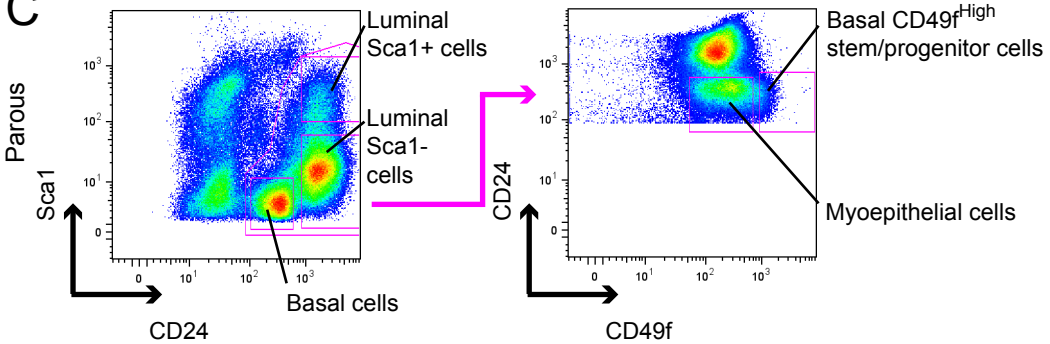**D**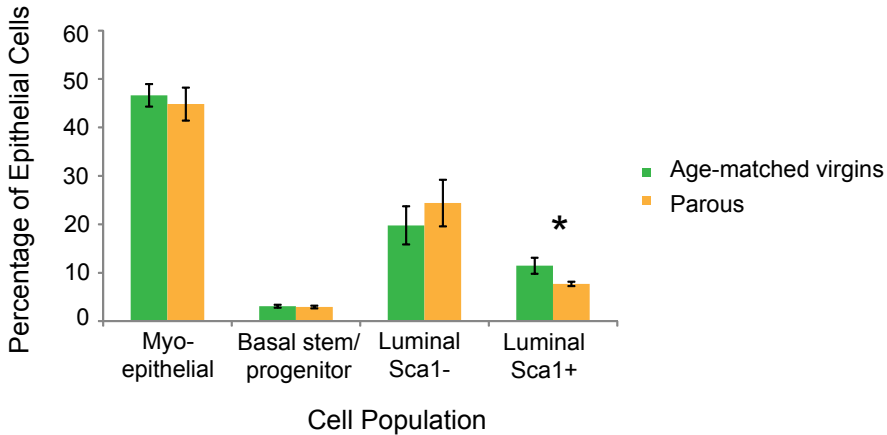

Supplement: MOESM10 [file 9703556]
